# Supplementary material for: Antimelanogenic Effect of an Oroxylum indicum Seed Extract by Suppression of MITF Expression through Activation of MAPK Signaling Protein
Source: PubMed Central journal article supplement (PMC5877621; doi:10.3390/ijms19030760), 2018-03-07
Supplement: ijms-19-00760-s001.pdf [file ijms-19-00760-s001.pdf]

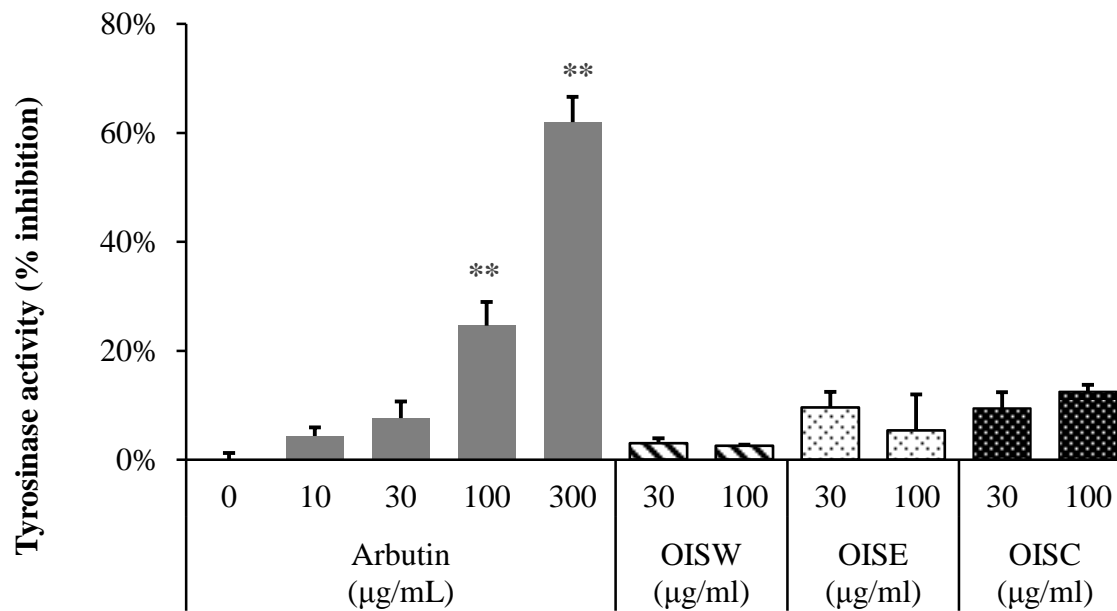

Figure S1: Mushroom tyrosinase inhibition activities of methanolic extract and various organic solution fractions of *Oroxylum indicum* seed . Values are expressed as the mean  $\pm$  SD (n=3). \*\*p < 0.01, significantly different from control, using student's t-test.

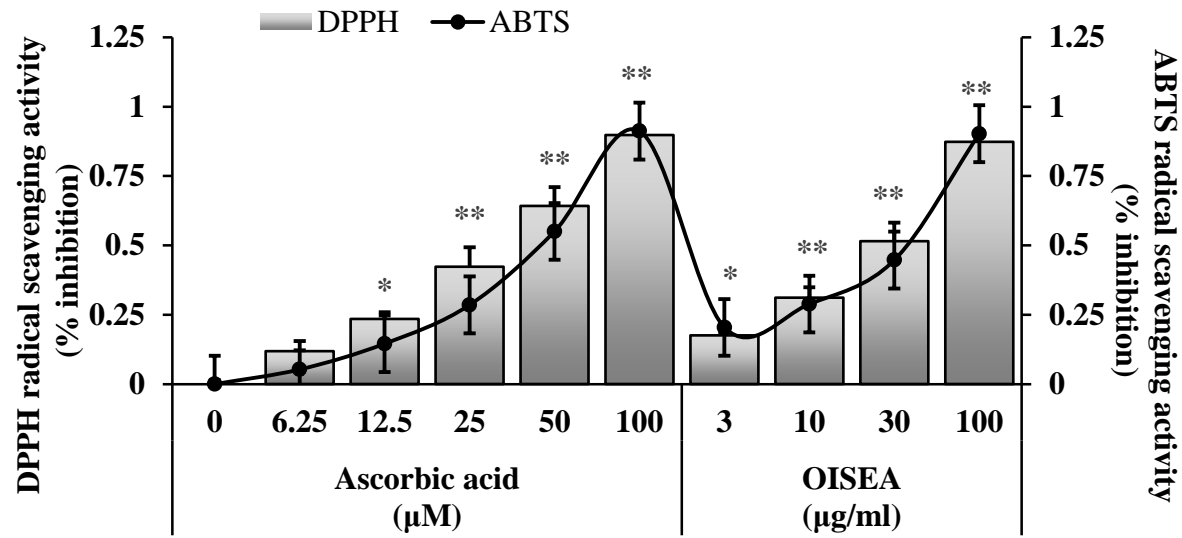

Figure S2: DPPH- and ABTS-radical scavenging activities of ethylacetate fractions of *Oroxylum indicum* seed. Values are expressed as the mean  $\pm$  SD (n=3). \*p < 0.05 and \*\*p < 0.01, significantly different from control, using student's t-test.

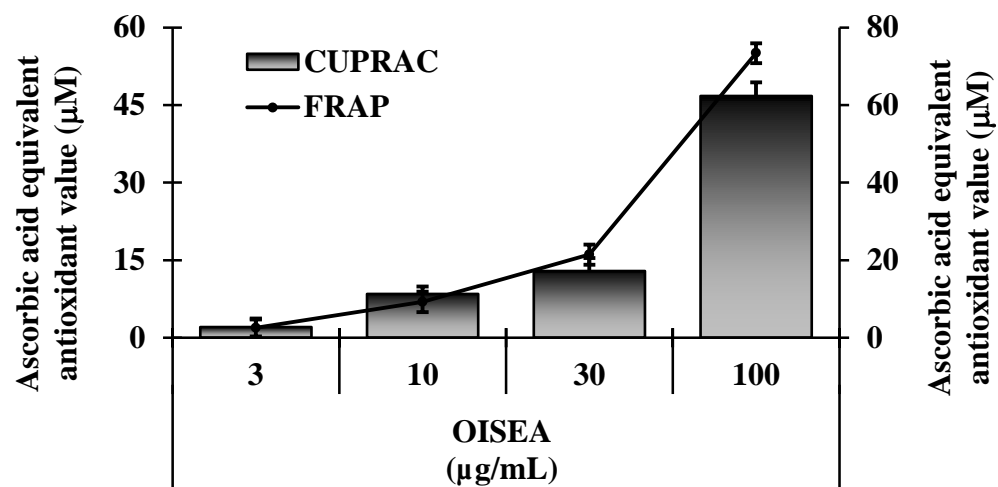

Figure S3: CUPRAC and FRAP activities of ethylacetate fractions of *Oroxyllum indicum* seed . Values are expressed as the mean  $\pm$  SD (n=3). \*p < 0.05 and \*\*p < 0.01, significantly different from control, using student's t-test.
